# Supplementary material for: Observation of inserted oxocarbonyl species in the tantalum cation-mediated activation of carbon dioxide dictated by two-state reactivity
Source: Royal Society of Chemistry journal article supplement (doi:10.1039/d3dt03593j), 2023-11-18
Supplement: d3dt03593j1.pdf [file d3dt03593j1.pdf]

Supporting information for

# Observation of Inserted Oxocarbonyl Species in the Tantalum Cation-Mediated Activation of Carbon Dioxide Dictated by Two-State Reactivity

Jia Han,<sup>1</sup> Pengcheng Liu,<sup>2,3</sup> Binglin Qiu,<sup>1</sup> Guanjun Wang,<sup>4,\*</sup>

Shilin Liu,<sup>1</sup> Xiaoguo Zhou<sup>1,\*</sup>

1. *Hefei National Laboratory for Physical Sciences at the Microscale, Department of Chemical Physics, University of Science and Technology of China, Hefei, 230026, China*
2. *Anhui Institute of Optics and Fine Mechanics, Hefei Institutes of Physical Science, Chinese Academy of Sciences, Hefei, 230031, China*
3. *Science Island Branch, Graduate School, University of Science and Technology of China, Hefei, 230026, China*
4. *Department of Chemistry, Fudan University, Shanghai, 200433, China*

## Contents:

**Figure S1.** Optimized geometries of isomers for the  $[\text{TaO}_2(\text{CO})_2(\text{CO}_2)_2]^+$  complex in the singlet state and their relative energies (in  $\text{kcal}\cdot\text{mol}^{-1}$ ) calculated at the PBE0-D3(BJ)/def2-TZVP level of theory (bond lengths in Ångströms and bond angles in degrees).

**Figure S2.** Optimized geometries of isomers for the  $[\text{TaO}(\text{CO})(\text{CO}_2)_3]^+$  complex in different spin states and their relative energies (in  $\text{kcal}\cdot\text{mol}^{-1}$ ) calculated at the PBE0-D3(BJ)/def2-TZVP level of theory (bond lengths in Ångströms and bond angles in degrees).

**Figure S3.** Optimized geometries of isomers for the  $[\text{Ta}(\text{CO}_2)_4]^+$  complex in different spin states and their relative energies (in  $\text{kcal}\cdot\text{mol}^{-1}$ ) calculated at the

PBE0-D3(BJ)/def2-TZVP level of theory (bond lengths in Ångströms and bond angles in degrees).

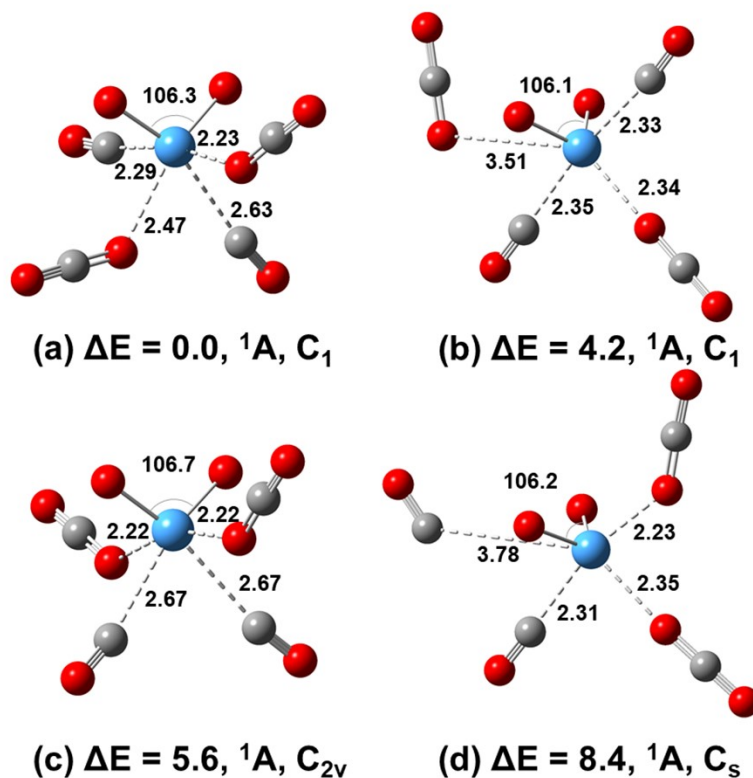

**Figure S1.** Optimized geometries of isomers for the  $[\text{TaO}_2(\text{CO})_2(\text{CO}_2)_2]^+$  complex in the singlet state and their relative energies (in  $\text{kcal}\cdot\text{mol}^{-1}$ ) calculated at the PBE0-D3(BJ)/def2-TZVP level of theory (bond lengths in Ångströms and bond angles in degrees).

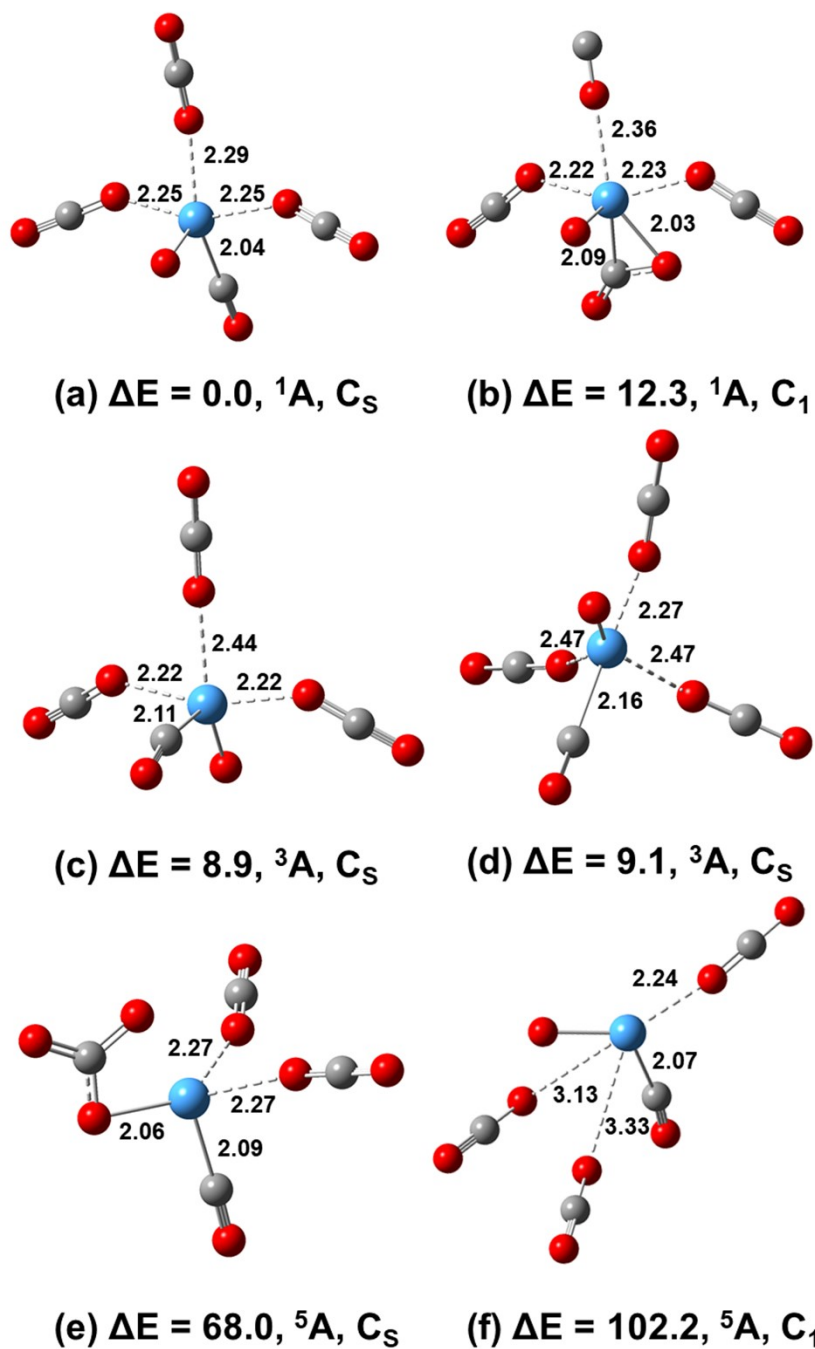

**Figure S2.** Optimized geometries of isomers for the  $[\text{TaO}(\text{CO})(\text{CO}_2)_3]^+$  complex in different spin states and their relative energies (in  $\text{kcal}\cdot\text{mol}^{-1}$ ) calculated at the PBE0-D3(BJ)/def2-TZVP level of theory (bond lengths in Ångströms and bond angles in degrees).

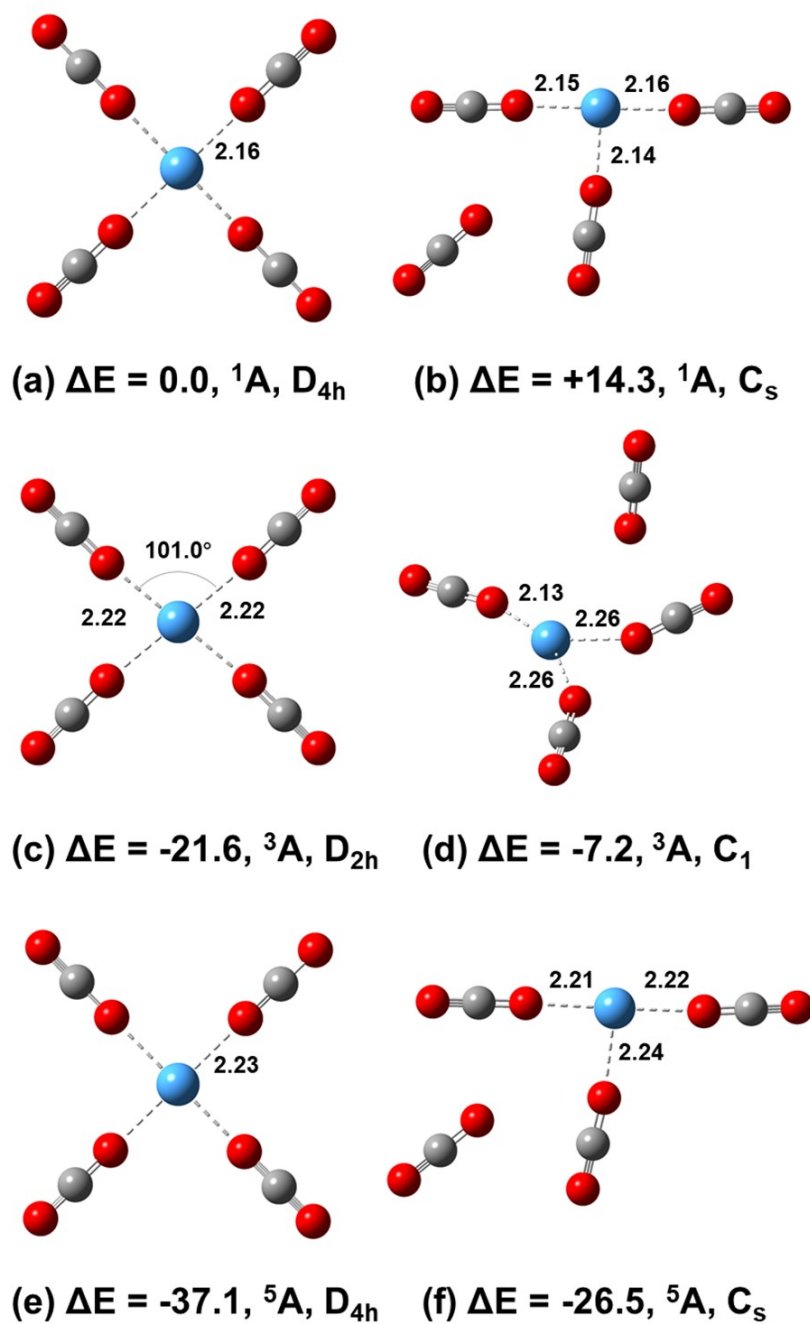

**Figure S3.** Optimized geometries of isomers for the  $[\text{Ta}(\text{CO}_2)_4]^+$  complex in different spin states and their relative energies (in  $\text{kcal}\cdot\text{mol}^{-1}$ ) calculated at the PBE0-D3(BJ)/def2-TZVP level of theory (bond lengths in Ångströms and bond angles in degrees).
